# Supplementary material for: Plastomes Provide Insights into Differences between Morphology and Molecular Phylogeny: Ostericum and Angelica (Apiaceae) as an Example
Source: MDPI journal article supplement (doi:10.3390/d14090776), 2022-09-19
Supplement: s1 [file s1]

**Table S1.** Scientific names and abbreviations of the species

| Abbreviations            | Scientific names                                                            |
|--------------------------|-----------------------------------------------------------------------------|
| <i>A. sylvestris</i>     | <i>Angelica sylvestris</i> Linnaeus                                         |
| <i>A. amurensis</i>      | <i>Angelica amurensis</i> Schischk.                                         |
| <i>A. biserrata</i>      | <i>Angelica biserrata</i> (Shan et Yuan) Yuan et Shan                       |
| <i>A. dahurica</i>       | <i>Angelica dahurica</i> (Fisch. ex Hoffm.) Benth. et Hook. f. ex Franch. e |
| <i>A. tianmuensis</i>    | <i>Angelica tianmuensis</i> Z. H. Pan & T. D. Zhuang                        |
| <i>O. palustre</i>       | <i>Ostericum palustre</i> (Besser) Besser                                   |
| <i>O. atropurpureum</i>  | <i>Ostericum atropurpureum</i> G.Y.Li, G.H.Xia & W.Y.Xie                    |
| <i>O. citriodorum</i>    | <i>Ostericum citriodorum</i> (Hance) Yuan et Shan                           |
| <i>O. grosseserratum</i> | <i>Ostericum grosseserratum</i> (Maxim.) Kitagawa                           |
| <i>O. huadongense</i>    | <i>Ostericum huadongense</i> Z. H. Pan & X. H. Li                           |
| <i>O. maximowiczii</i>   | <i>Ostericum maximowiczii</i> (Fr. Schmidt ex Maxim.) Kitagawa              |
| <i>O. muliense</i>       | <i>Ostericum muliense</i> (Shan Renhwa et Pu Fating)<br>Pimenov et Kljuykov |
| <i>O. scaberulum</i>     | <i>Ostericum scaberulum</i> (Franch.) Yuan et Shan                          |
| <i>O. sieboldii</i>      | <i>Ostericum sieboldii</i> (Miq.) Nakai                                     |
| <i>P. neurophyllum</i>   | <i>Pterygopleurum neurophyllum</i> (Maxim.) Kitag.                          |
| <i>P. davidii</i>        | <i>Pternopetalum davidii</i> Franch.                                        |
| <i>P. vulgare</i>        | <i>Pternopetalum vulgare</i> (Dunn) Hand.-Mazz.                             |
